# Supplementary material for: Low dietary choline intake is associated with the risk of osteoporosis in elderly individuals: a population-based study
Source: Royal Society of Chemistry journal article supplement (doi:10.1039/d1fo00825k), 2021-01-01
Supplement: d1fo00825k1.pdf [file d1fo00825k1.pdf]

**Supplementary table: The analysis of relationship between osteoporosis and dietary choline intake levels according to the gender stratification**

|                                        | Male, <i>n</i> / <i>%</i> |                  | Female, <i>n</i> / <i>%</i> |                  |
|----------------------------------------|---------------------------|------------------|-----------------------------|------------------|
|                                        | Osteoporosis              | Non-osteoporosis | Osteoporosis                | Non-osteoporosis |
| Categorical                            |                           |                  |                             |                  |
| Tertile 1 (199.0 [ $\leq 300$ ])       | 33 (50.0)                 | 751 (48.0)       | 273 (70.4)                  | 853 (73.5)       |
| Tertile 2 (387.4 [ $>300, \leq 600$ ]) | 31 (47.0)                 | 696 (44.5)       | 108 (27.8)                  | 290 (25.0)       |
| Tertile 3 (677.3 [ $>600$ ])           | 2 (3.0)                   | 118 (7.5)        | 7 (1.8)                     | 17 (1.5)         |
| <i>P</i> value                         |                           | 0.305            |                             | 0.713            |
